# Supplementary material
Source: ML conference proceedings conference paper supplement (https://openreview.net/forum?id=gKw4EXpC0s)

**N0 (T)**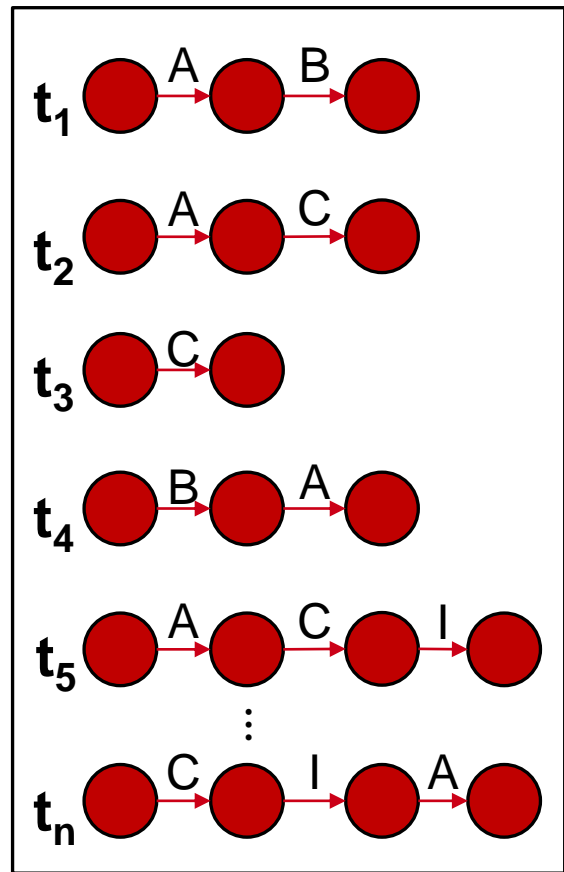**N1**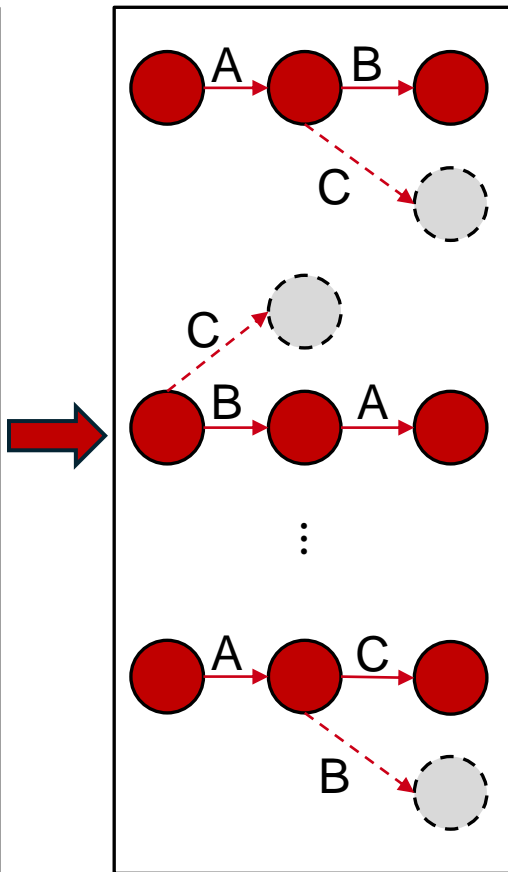**N2**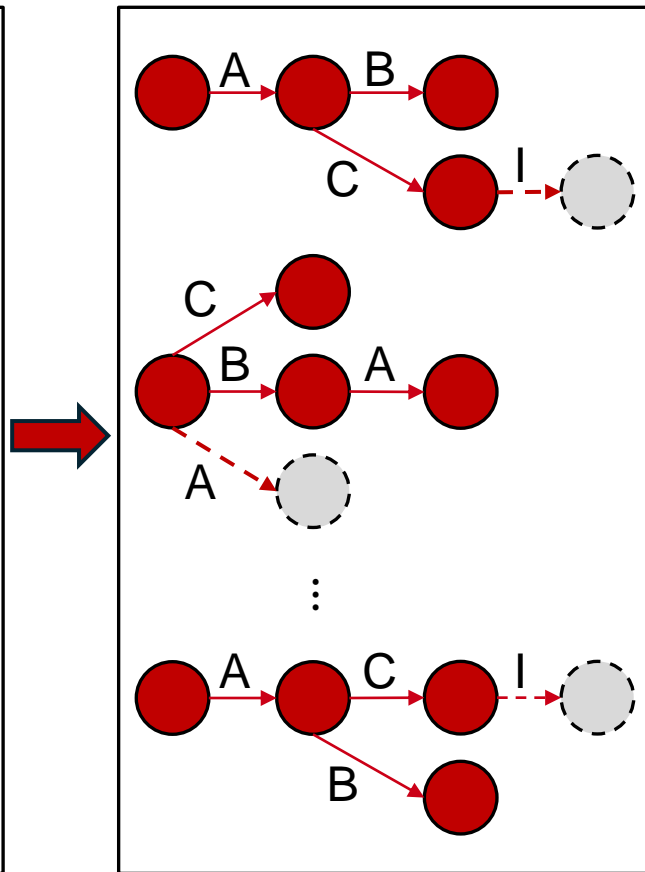 $\bigcup_{t \in T} t$ 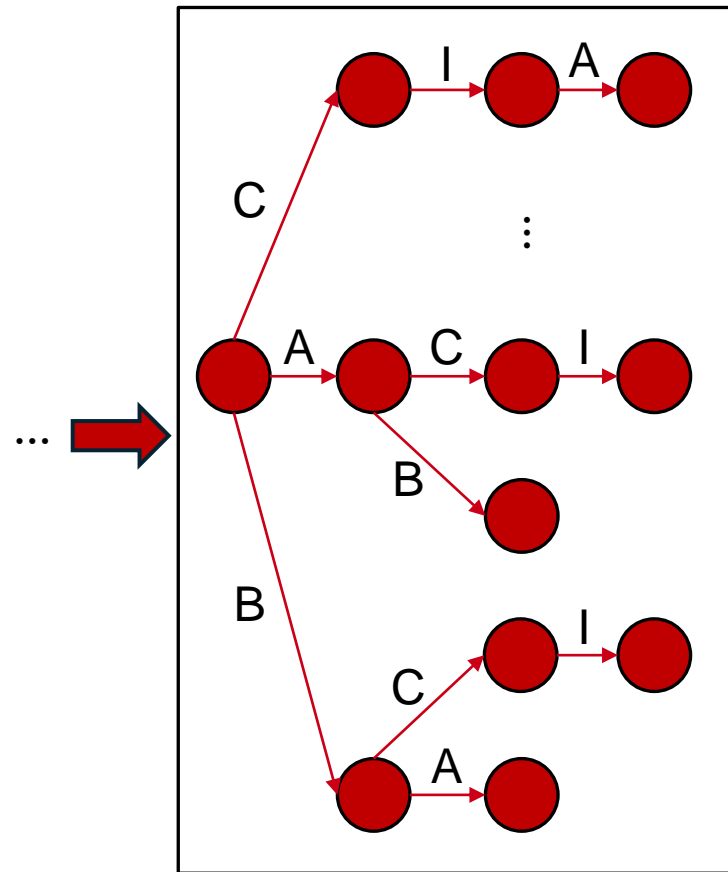

Supplement: supplementary_material [file attachment]

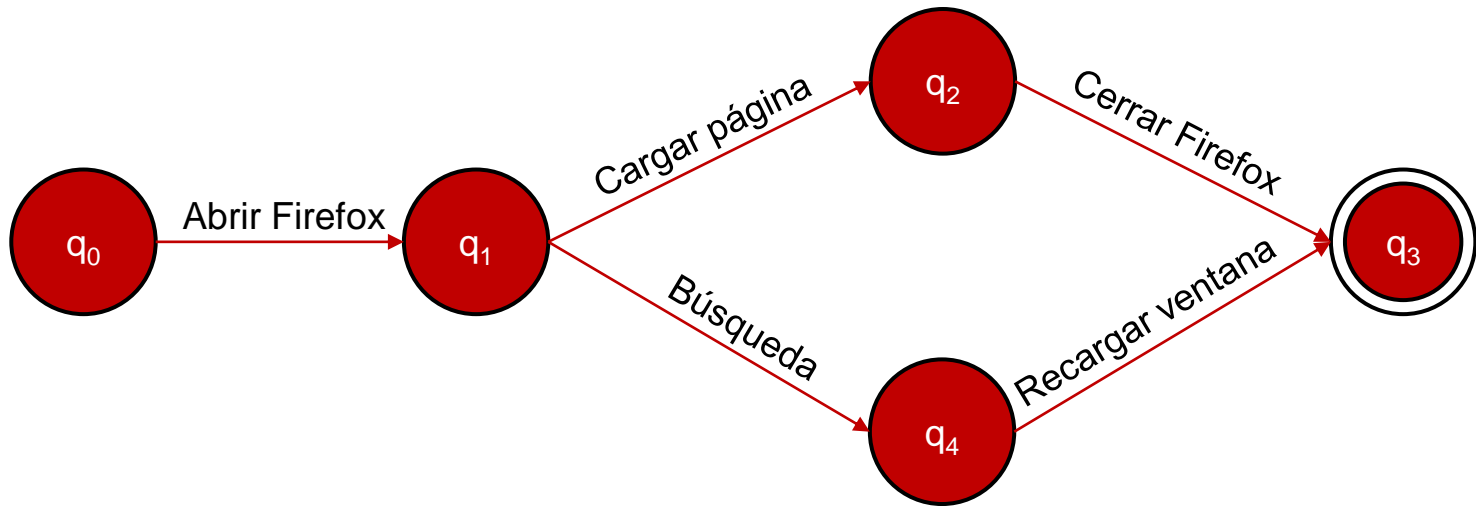

Supplement: supplementary_material [file attachment]

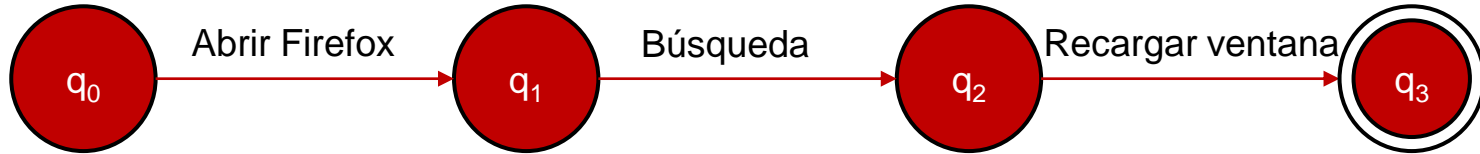

Supplement: supplementary_material [file attachment]

# Tamaño vs Sobrestimación

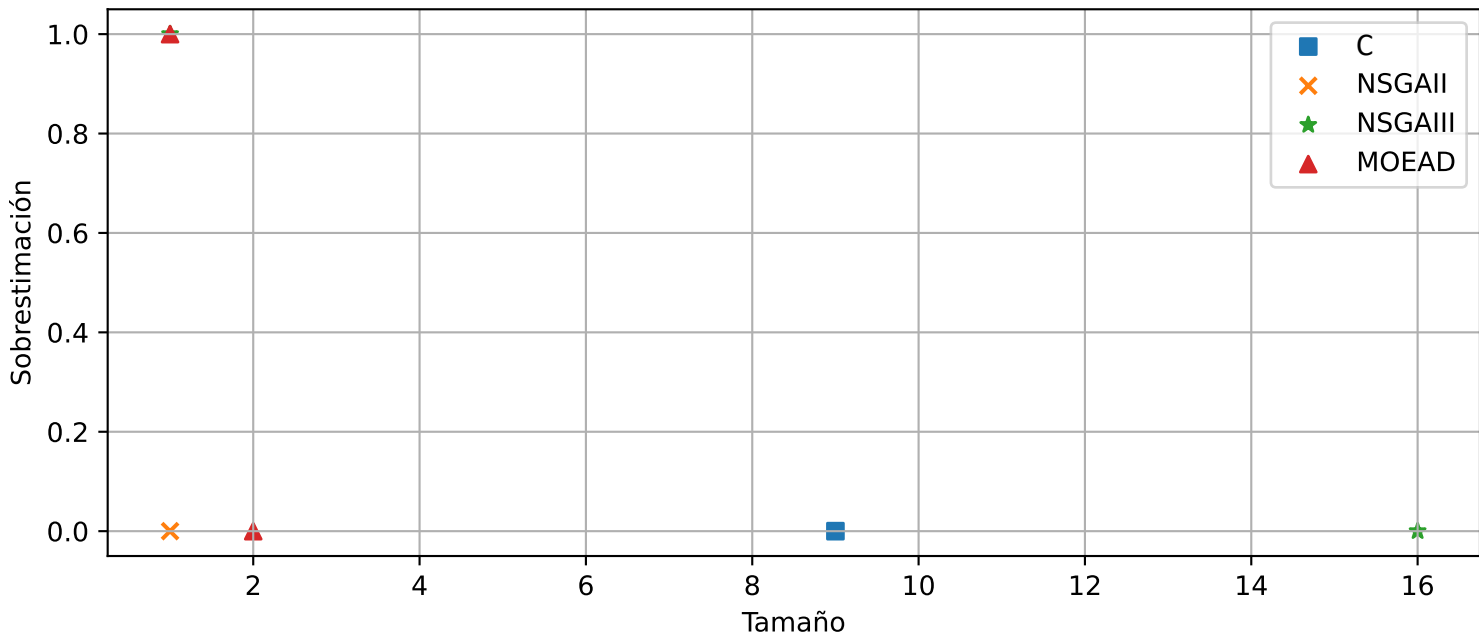

Supplement: supplementary_material [file attachment]

# Subestimación vs Tamaño

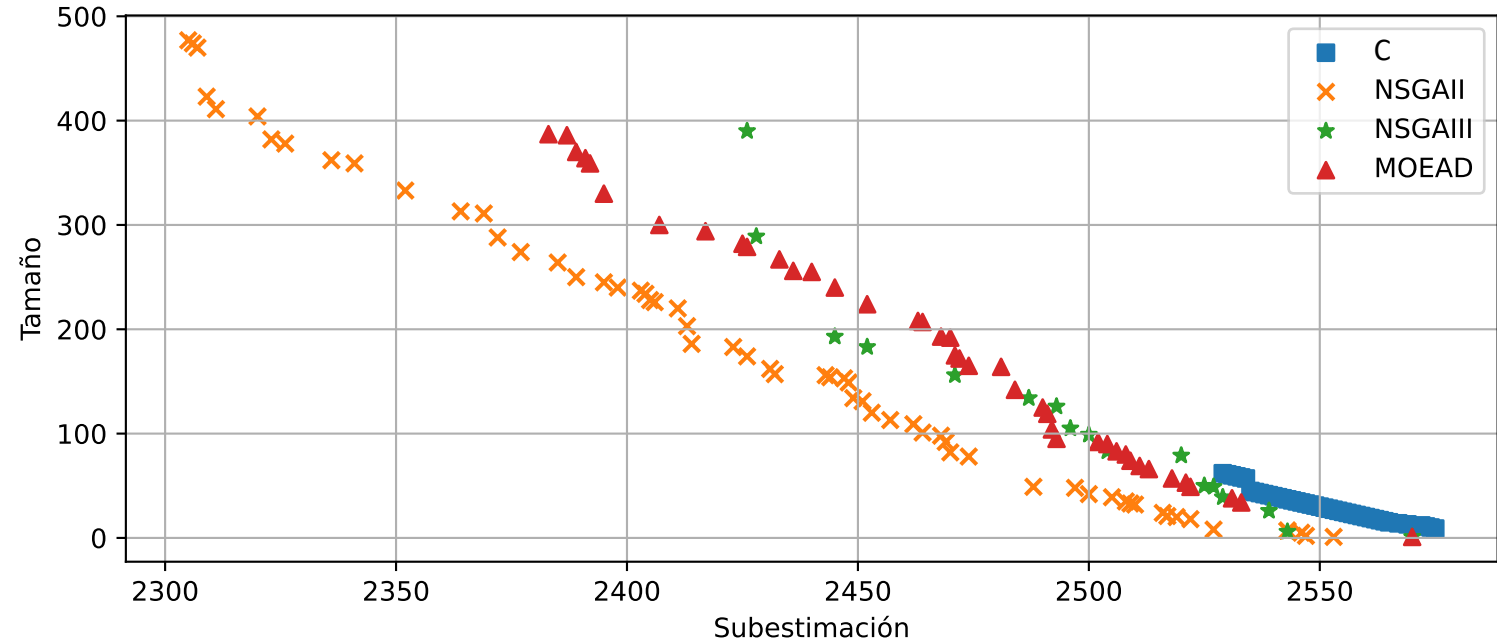

Supplement: supplementary_material [file attachment]

# Subestimación vs Sobrestimación

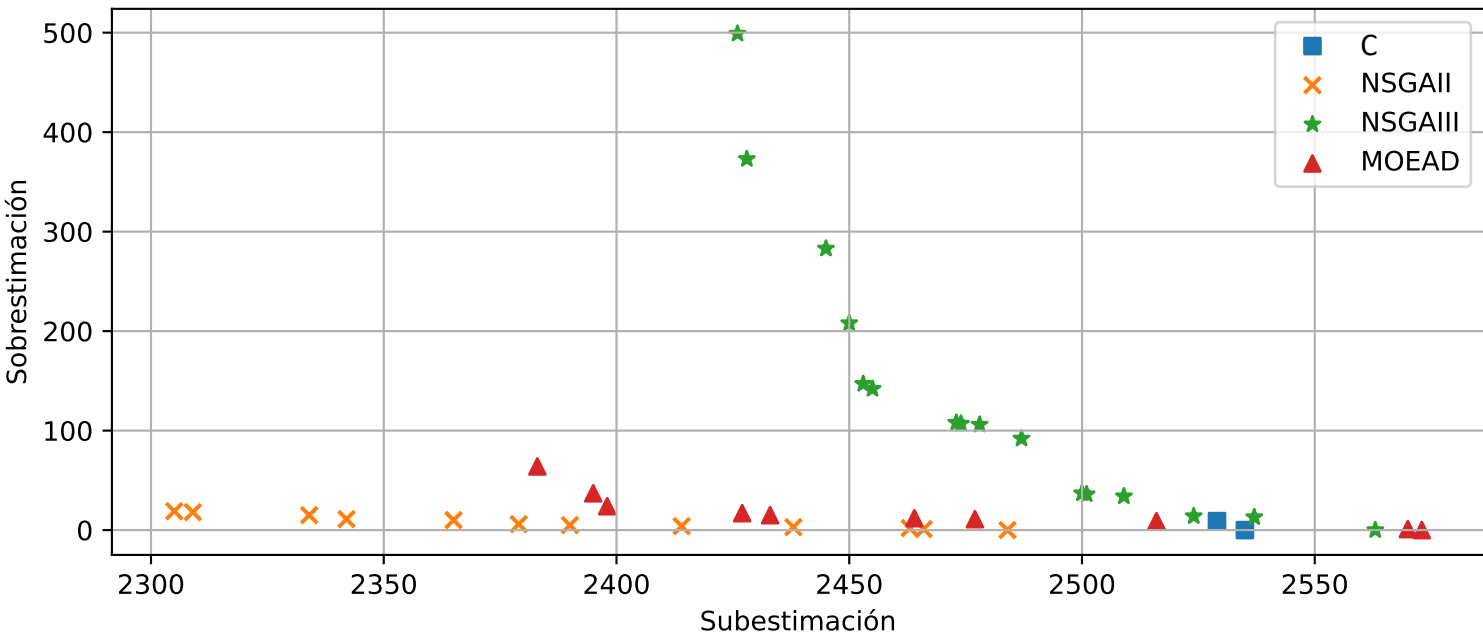

Supplement: supplementary_material [file attachment]

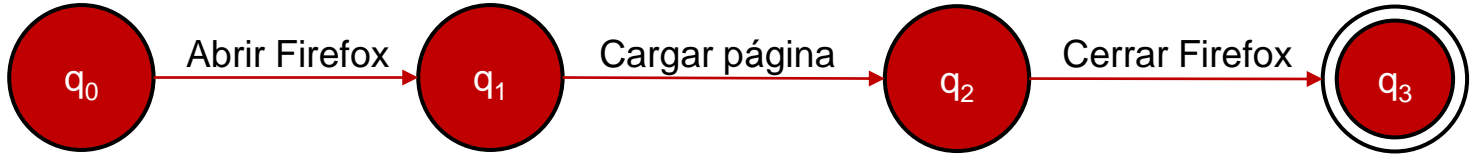

Supplement: supplementary_material [file attachment]
